# Supplementary material for: Community Engagement Mental Health Model for Home Treatment of Psychosis in Jamaica
Source: Atypon-hosted journal article supplement (doi:10.1176/appi.ps.201900063), 2020-03-02
Supplement: appi.ps.201900063.ds001.pdf [file appi.ps.201900063.ds001.pdf]

### Community Engagement Mental Health Model for Home Treatment of Psychosis in Jamaica

## Number of Patients with Psychotic Disorders Treated in the Jamaican Community Mental Health Services

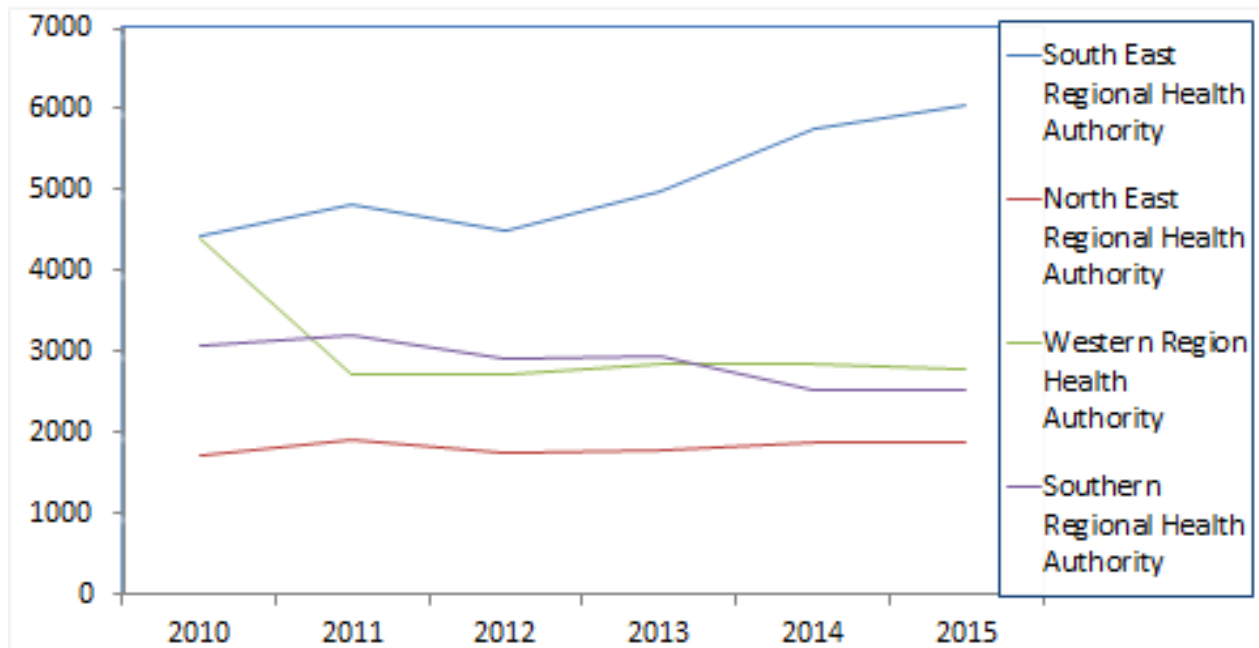

Figure 1: The number of patients with psychosis accessing care following the implementation of community engagement mental health model in the South East Regional Health Authority
